# Supplementary material for: Association between homocysteine, vitamin B12, folic acid and erectile dysfunction: a cross-sectional study in China
Source: PubMed Central journal article supplement — BMJ Open. 2019 May 22;9(5):e023003. doi: 10.1136/bmjopen-2018-023003 (PMC6537974; doi:10.1136/bmjopen-2018-023003), 2019-05-22
Supplement: bmjopen-2018-023003supp001.pdf [file bmjopen-2018-023003supp001.pdf]

| Excluded diseases     | Excluded drugs                                                                                           |
|-----------------------|----------------------------------------------------------------------------------------------------------|
| Hypertension          | Vitamins: Vitamins B12, Vitamins C, Vitamins B2, etc.                                                    |
| Diabetes              | Antidiabetic medicines: insulin, metformin, Nigestedglinide, etc.                                        |
| Angina                | Non-steroidal anti-inflammatory drugs: aspirin, acetaminophen, indomethacin, diclofenac, celecoxib, etc. |
| Myocardial infarction | Antibiotics: penicillin, cephalosporins, aztreonam, ofloxacin, clarithromycin, etc.                      |
| Stroke                | Cimetidine:                                                                                              |
| Gout                  | Glucocorticoids: hydrocortisone, prednisone, methylprednisolone, hexadecadrol, etc.                      |
| Rheumatoid arthritis  |                                                                                                          |
| Prostatitis           |                                                                                                          |
| Hepatitis B           |                                                                                                          |
| Various cancers       |                                                                                                          |
| Parotiditis           |                                                                                                          |
| Urolithiasis          |                                                                                                          |
| Pelvic floor surgery  |                                                                                                          |

Table S1. The list of diseases and drugs excluded in this study



|          |                |                      |              |       |              |       |       |              |       |       |               |       |
|----------|----------------|----------------------|--------------|-------|--------------|-------|-------|--------------|-------|-------|---------------|-------|
| Mild     | <b>767.519</b> | <b>1.649-3.573E5</b> | <b>0.034</b> | 4.093 | 0.337-49.760 | 0.269 | 0.677 | 0.038-12.139 | 0.791 | 0.645 | 0.008-52.675  | 0.845 |
| Moderate | 11.236         | 0.098-1.289E3        | 0.317        | 2.266 | 0.283-18.119 | 0.441 | 1.067 | 0.092-12.408 | 0.959 | 2.717 | 0.049-150.689 | 0.626 |
| Severe   | 70.920         | 0.291-1.729E4        | 0.129        | 3.281 | 0.316-34.092 | 0.320 | 0.424 | 0.037-4.866  | 0.491 | 0.027 | 0.000-3.577   | 0.148 |

Table S2. Association between ED and HCY, B12, FA level in four ages groups (<40, 40-49, 50-59 and ≥60 years) after adjusting multivariate

\* Linear regression for the IIEF-5; binary regression analysis for ED; multinomial logistic regression for the severity of symptom of ED

\* ED is divided into four groups according to the IIEF-5 scores: None=22-25 scores, Mild=17-21 scores, Moderate=12-16 scores and Severe=5-11 scores. None ED is treated as the reference.

\* ED: erectile dysfunction; HCY= homocysteine; B12= vitamin B12; FA= folic acid; BMI: body mass index; WHR: waist hip rate; OR: odd ratio; 95%CI: 95% confidence interval

\* Binary\_HCY: Normal HCY (5-15μmol/L); hyperhomocysteinemia (>15umol/L)

\* Multi-adjusted: age, BMI, WHR, smoke and drink



|                    |          |              |                              |              |              |                    |              |                     |                           |              |       |             |       |
|--------------------|----------|--------------|------------------------------|--------------|--------------|--------------------|--------------|---------------------|---------------------------|--------------|-------|-------------|-------|
|                    | Mild     | 0.765        | 0.351-1.669                  | 0.501        | 1.403        | 0.924-2.130        | 0.112        | 1.156               | 0.612-2.183               | 0.655        | 1.202 | 0.587-2.462 | 0.615 |
|                    | Moderate | 1.581        | 0.567-4.414                  | 0.381        | 1.800        | 0.849-3.818        | 0.126        | 0.640               | 0.225-1.821               | 0.403        | 1.244 | 0.345-4.481 | 0.739 |
|                    | Severe   | 0.479        | 0.064-3.567                  | 0.472        | 1.170        | 0.461-2.970        | 0.741        | 0.491               | 0.142-1.691               | 0.259        | 0.569 | 0.116-2.788 | 0.487 |
| Age-Adjusted       |          |              |                              |              |              |                    |              |                     |                           |              |       |             |       |
| Marital status     |          |              |                              |              |              |                    |              |                     |                           |              |       |             |       |
| Live together      |          | 9.868        | 0.559-1.347                  | 0.528        | 1.110        | 0.873-1.412        | 0.394        | 1.333               | 0.954-1.861               | 0.092        | 1.122 | 0.743-1.694 | 0.584 |
|                    | None     | 1            | 1                            | 1            | 1            | 1                  | 1            | 1                   | 1                         | 1            | 1     | 1           | 1     |
|                    | Mild     | 0.940        | 0.586-1.508                  | 0.796        | 1.157        | 0.892-1.501        | 0.271        | 1.436               | 0.996-2.072               | 0.053        | 1.176 | 0.752-1.839 | 0.478 |
|                    | Moderate | 0.874        | 0.402-1.902                  | 0.735        | 1.110        | 0.735-1.676        | 0.620        | 1.015               | 0.583-1.766               | 0.958        | 0.947 | 0.469-1.909 | 0.878 |
|                    | Severe   | 0.378        | 0.114-1.258                  | 0.113        | 0.762        | 0.428-1.357        | 0.356        | 1.353               | 0.622-2.943               | 0.445        | 1.193 | 0.459-3.097 | 0.717 |
| Alone              |          | 1.611        | 0.566-4.586                  | 0.371        | 1.406        | 0.793-2.493        | 0.243        | 1.391               | 0.653-2.961               | 0.392        | 0.622 | 0.257-1.506 | 0.292 |
|                    | None     | 1            | 1                            | 1            | 1            | 1                  | 1            | 1                   | 1                         | 1            | 1     | 1           | 1     |
|                    | Mild     | 0.850        | 0.216-3.352                  | 0.817        | 1.210        | 0.598-2.451        | 0.596        | <b>3.742</b>        | <b>1.258-11.129</b>       | <b>0.018</b> | 0.799 | 0.294-2.169 | 0.659 |
|                    | Moderate | 1.019        | 0.132-7.836                  | 0.986        | 0.831        | 0.272-2.542        | 0.745        | 1.492               | 0.339-6.562               | 0.597        | 0.341 | 0.060-1.947 | 0.226 |
|                    | Severe   | <b>5.085</b> | <b>1.195-21.636</b>          | <b>0.028</b> | <b>2.448</b> | <b>1.046-5.733</b> | <b>0.039</b> | 0.450               | 0.175-1.159               | 0.098        | 0.516 | 0.122-2.174 | 0.367 |
| educational status |          |              |                              |              |              |                    |              |                     |                           |              |       |             |       |
| Primary            |          | 0.285        | 0.001-61.236                 | 0.647        | 0.212        | 0.010-4.431        | 0.317        | 10.044              | 0.027-3.674E <sup>3</sup> | 0.444        | 0.421 | 0.080-2.228 | 0.309 |
|                    | None     | 1            | 1                            | 1            | 1            | 1                  | 1            | 1                   | 1                         | 1            | 1     | 1           | 1     |
|                    | Mild     | 1.588        | 0.004-601.127                | 0.879        | 0.228        | 0.010-5.326        | 0.357        | 4.021               | 0.062-259.697             | 0.513        | 0.485 | 0.093-2.542 | 0.392 |
|                    | Moderate | 0.001        | 7.773E <sup>-8</sup> -6.096  | 0.116        | 0.139        | 0.003-6.581        | 0.316        | 3.874E <sup>3</sup> | 1.164-1.289E <sup>7</sup> | 0.046        | 0.426 | 0.024-7.587 | 0.561 |
|                    | Severe   | 0.035        | 1.430E <sup>-5</sup> -84.089 | 0.398        | 0.118        | 0.002-6.145        | 0.290        | 8.466               | 0.008-8.474E <sup>3</sup> | 0.545        | 0.162 | 0.005-5.514 | 0.311 |
| Intermediate       |          | 1.392        | 0.820-2.365                  | 0.221        | 1.209        | 0.915-1.597        | 0.182        | 1.384               | 0.954-2.009               | 0.087        | 1.073 | 0.669-1.722 | 0.769 |
|                    | None     | 1            | 1                            | 1            | 1            | 1                  |              | 1                   | 1                         | 1            | 1     | 1           | 1     |
|                    | Mild     | 1.382        | 0.774-2.468                  | 0.275        | 1.229        | 0.906-1.668        | 0.186        | <b>1.723</b>        | <b>1.133-2.620</b>        | <b>0.011</b> | 1.206 | 0.717-2.030 | 0.480 |
|                    | Moderate | 1.145        | 0.470-2.787                  | 0.766        | 1.084        | 0.682-1.724        | 0.733        | 0.966               | 0.529-1.764               | 0.911        | 0.754 | 0.346-1.643 | 0.478 |
|                    | Severe   | 1.915        | 0.698-5.257                  | 0.207        | 1.298        | 0.748-2.254        | 0.354        | 0.840               | 0.409-1.726               | 0.635        | 1.022 | 0.397-2.632 | 0.964 |
| Superior           |          | 0.779        | 0.391-1.552                  | 0.477        | 1.324        | 0.900-1.948        | 0.154        | 0.953               | 0.540-1.684               | 0.869        | 0.898 | 0.461-1.750 | 0.751 |

|                       |               |                       |                                            |       |       |                              |       |                              |                     |              |       |                           |       |
|-----------------------|---------------|-----------------------|--------------------------------------------|-------|-------|------------------------------|-------|------------------------------|---------------------|--------------|-------|---------------------------|-------|
|                       | None          | 1                     | 1                                          | 1     | 1     | 1                            | 1     | 1                            | 1                   | 1            | 1     | 1                         | 1     |
|                       | Mild          | 0.672                 | 0.297-1.521                                | 0.340 | 1.289 | 0.841-1.976                  | 0.245 | 1.175                        | 0.618-2.238         | 0.623        | 0.960 | 0.458-2.012               | 0.914 |
|                       | Moderate      | 1.421                 | 0.486-4.155                                | 0.521 | 1.583 | 0.736-3.405                  | 0.240 | 0.682                        | 0.241-1.926         | 0.470        | 0.917 | 0.244-3.440               | 0.898 |
|                       | Severe        | 0.521                 | 0.074-3.647                                | 0.511 | 1.202 | 0.472-3.061                  | 0.699 | 0.473                        | 0.132-1.690         | 0.249        | 0.622 | 0.125-3.096               | 0.562 |
| Multivariate adjusted |               |                       |                                            |       |       |                              |       |                              |                     |              |       |                           |       |
| Marital status        |               |                       |                                            |       |       |                              |       |                              |                     |              |       |                           |       |
|                       | Live together | 0.894                 | 0.575-1.390                                | 0.619 | 1.137 | 0.893-1.448                  | 0.299 | 1.349                        | 0.962-1.891         | 0.083        | 1.176 | 0.773-1.789               | 0.449 |
|                       | None          | 1                     | 1                                          | 1     | 1     | 1                            | 1     | 1                            | 1                   | 1            | 1     | 1                         | 1     |
|                       | Mild          | 0.963                 | 0.598-1.548                                | 0.875 | 1.181 | 0.909-1.534                  | 0.213 | <b>1.501</b>                 | <b>1.035-2.175</b>  | <b>0.032</b> | 1.245 | 0.790-1.961               | 0.345 |
|                       | Moderate      | 0.913                 | 0.420-1.985                                | 0.818 | 1.136 | 0.751-1.719                  | 0.547 | 0.971                        | 0.554-1.701         | 0.918        | 0.933 | 0.455-1.915               | 0.851 |
|                       | Severe        | 0.417                 | 0.126-1.378                                | 0.152 | 0.812 | 0.454-1.453                  | 0.483 | 1.227                        | 0.562-2.675         | 0.608        | 1.317 | 0.494-3.514               | 0.582 |
|                       | Alone         | 1.602                 | 0.546-4.698                                | 0.390 | 1.399 | 0.779-2.512                  | 0.261 | 1.288                        | 0.558-2.975         | 0.553        | 0.678 | 0.253-1.820               | 0.441 |
|                       | None          | 1                     | 1                                          | 1     | 1     | 1                            | 1     | 1                            | 1                   | 1            | 1     | 1                         | 1     |
|                       | Mild          | 0.850                 | 0.206-3.498                                | 0.821 | 1.199 | 0.579-2.481                  | 0.625 | <b>3.449</b>                 | <b>1.113-10.692</b> | <b>0.032</b> | 0.959 | 0.279-3.292               | 0.947 |
|                       | Moderate      | 1.130                 | 0.135-9.481                                | 0.910 | 0.856 | 0.276-2.654                  | 0.788 | 1.244                        | 0.261-5.929         | 0.784        | 0.336 | 0.054-2.069               | 0.239 |
|                       | Severe        | 4.181                 | 0.951-19.374                               | 0.058 | 2.356 | 0.989-5.616                  | 0.053 | 0.302                        | 0.084-1.083         | 0.066        | 0.598 | 0.139-2.570               | 0.490 |
| educational status    |               |                       |                                            |       |       |                              |       |                              |                     |              |       |                           |       |
|                       | Primary       | 0.045                 | 0.000-51.900                               | 0.388 | 0.098 | 0.002-5.651                  | 0.262 | 6.248                        | 0.006-6.418E3       | 0.605        | 2.823 | 0.032-247.907             | 0.649 |
|                       | None          | 1                     | 1                                          | 1     | 1     | 1                            | 1     | 1                            | 1                   | 1            | 1     | 1                         | 1     |
|                       | Mild          | 0.198                 | 4.915E <sup>-5</sup> -794.766              | 0.702 | 0.224 | 0.004-13.29                  | 0.473 | 0.001                        | 3.247E-10-3.819E3   | 0.376        | 1.806 | 0.007-479.698             | 0.836 |
|                       | Moderate      | 2.184E <sup>-12</sup> | 2.988E <sup>-28</sup> -1.597E <sup>4</sup> | 0.150 | 0.004 | 1.429E-6-8.838               | 0.157 | <b>NA</b>                    | <b>NA</b>           | <b>0.043</b> | 3.396 | 0.006-1.820E <sup>3</sup> | 0.703 |
|                       | Severe        | 1.972E-9              | 1.318E <sup>-24</sup> -2.952E <sup>6</sup> | 0.261 | 0.008 | 4.142E <sup>-6</sup> -15.343 | 0.210 | <b>8.065E<sup>-217</sup></b> | <b>0.000-0.203</b>  | <b>0.049</b> | 0.516 | 0.001-457.324             | 0.849 |
|                       | Intermediate  | 1.431                 | 0.842-2.432                                | 0.186 | 1.223 | 0.925-1.618                  | 0.158 | 1.428                        | 0.981-2.081         | 0.063        | 1.092 | 0.677-1.764               | 0.717 |
|                       | None          | 1                     | 1                                          | 1     | 1     | 1                            | 1     | 1                            | 1                   | 1            | 1     | 1                         | 1     |
|                       | Mild          | 1.401                 | 0.782-2.510                                | 0.257 | 1.238 | 0.910-1.682                  | 0.174 | <b>1.858</b>                 | <b>1.214-2.845</b>  | <b>0.004</b> | 1.268 | 0.748-2.149               | 0.378 |
|                       | Moderate      | 1.225                 | 0.502-2.990                                | 0.656 | 1.105 | 0.694-1.761                  | 0.673 | 0.954                        | 0.519-1.755         | 0.880        | 0.707 | 0.319-1.568               | 0.394 |
|                       | Severe        | 2.044                 | 0.744-5.615                                | 0.165 | 1.350 | 0.776-2.351                  | 0.288 | 0.754                        | 0.364-1.562         | 0.448        | 0.969 | 0.367-2.562               | 0.950 |

|          |          |       |             |       |       |             |       |       |             |       |       |             |       |
|----------|----------|-------|-------------|-------|-------|-------------|-------|-------|-------------|-------|-------|-------------|-------|
| Superior |          | 0.812 | 0.405-1.627 | 0.557 | 1.360 | 0.920-2.011 | 0.123 | 0.977 | 0.550-1.738 | 0.938 | 0.889 | 0.449-1.762 | 0.737 |
|          | None     | 1     | 1           | 1     | 1     | 1           | 1     | 1     | 1           | 1     | 1     | 1           | 1     |
|          | Mild     | 0.702 | 0.308-1.598 | 0.399 | 1.325 | 0.859-2.044 | 0.204 | 1.202 | 0.632-2.287 | 0.575 | 0.898 | 0.419-1.926 | 0.783 |
|          | Moderate | 1.437 | 0.483-4.270 | 0.514 | 1.556 | 0.718-3.370 | 0.262 | 0.647 | 0.217-1.930 | 0.435 | 1.056 | 0.274-4.063 | 0.937 |
|          | Severe   | 0.598 | 0.092-3.890 | 0.591 | 1.333 | 0.513-3.459 | 0.555 | 0.496 | 0.123-2.002 | 0.325 | 0.715 | 0.145-3.529 | 0.681 |

Table S3. The logistic regression analyses (binary and multinomial) for the association between ED and HCY, B12 and FA in the subgroups of marital status and educational status

\* In the educational status, the Primary group only contains 24 participants. So, some results of regression analyses were exaggerated with these limited data

\* Multivariate adjusted: age, BMI, WHR, smoke and drink

\* HCY= homocysteine; B12= vitamin B12; FA= folic acid

\* Binary\_HCY: Normal HCY (5-15 $\mu$ mol/L); hyperhomocysteinemia (>15 $\mu$ mol/L)

\* ED status: none (IIEF-5 score 22–25); mild (17–21); moderate (12–16); and severe (5–11).
