# Supplementary material for: Association between homocysteine, vitamin B12, folic acid and erectile dysfunction: a cross-sectional study in China
Source: PubMed Central journal article supplement — BMJ Open. 2019 May 22;9(5):e023003. doi: 10.1136/bmjopen-2018-023003 (PMC6537974; doi:10.1136/bmjopen-2018-023003), 2019-05-22
Supplement: bmjopen-2018-023003supp002.pdf [file bmjopen-2018-023003supp002.pdf]

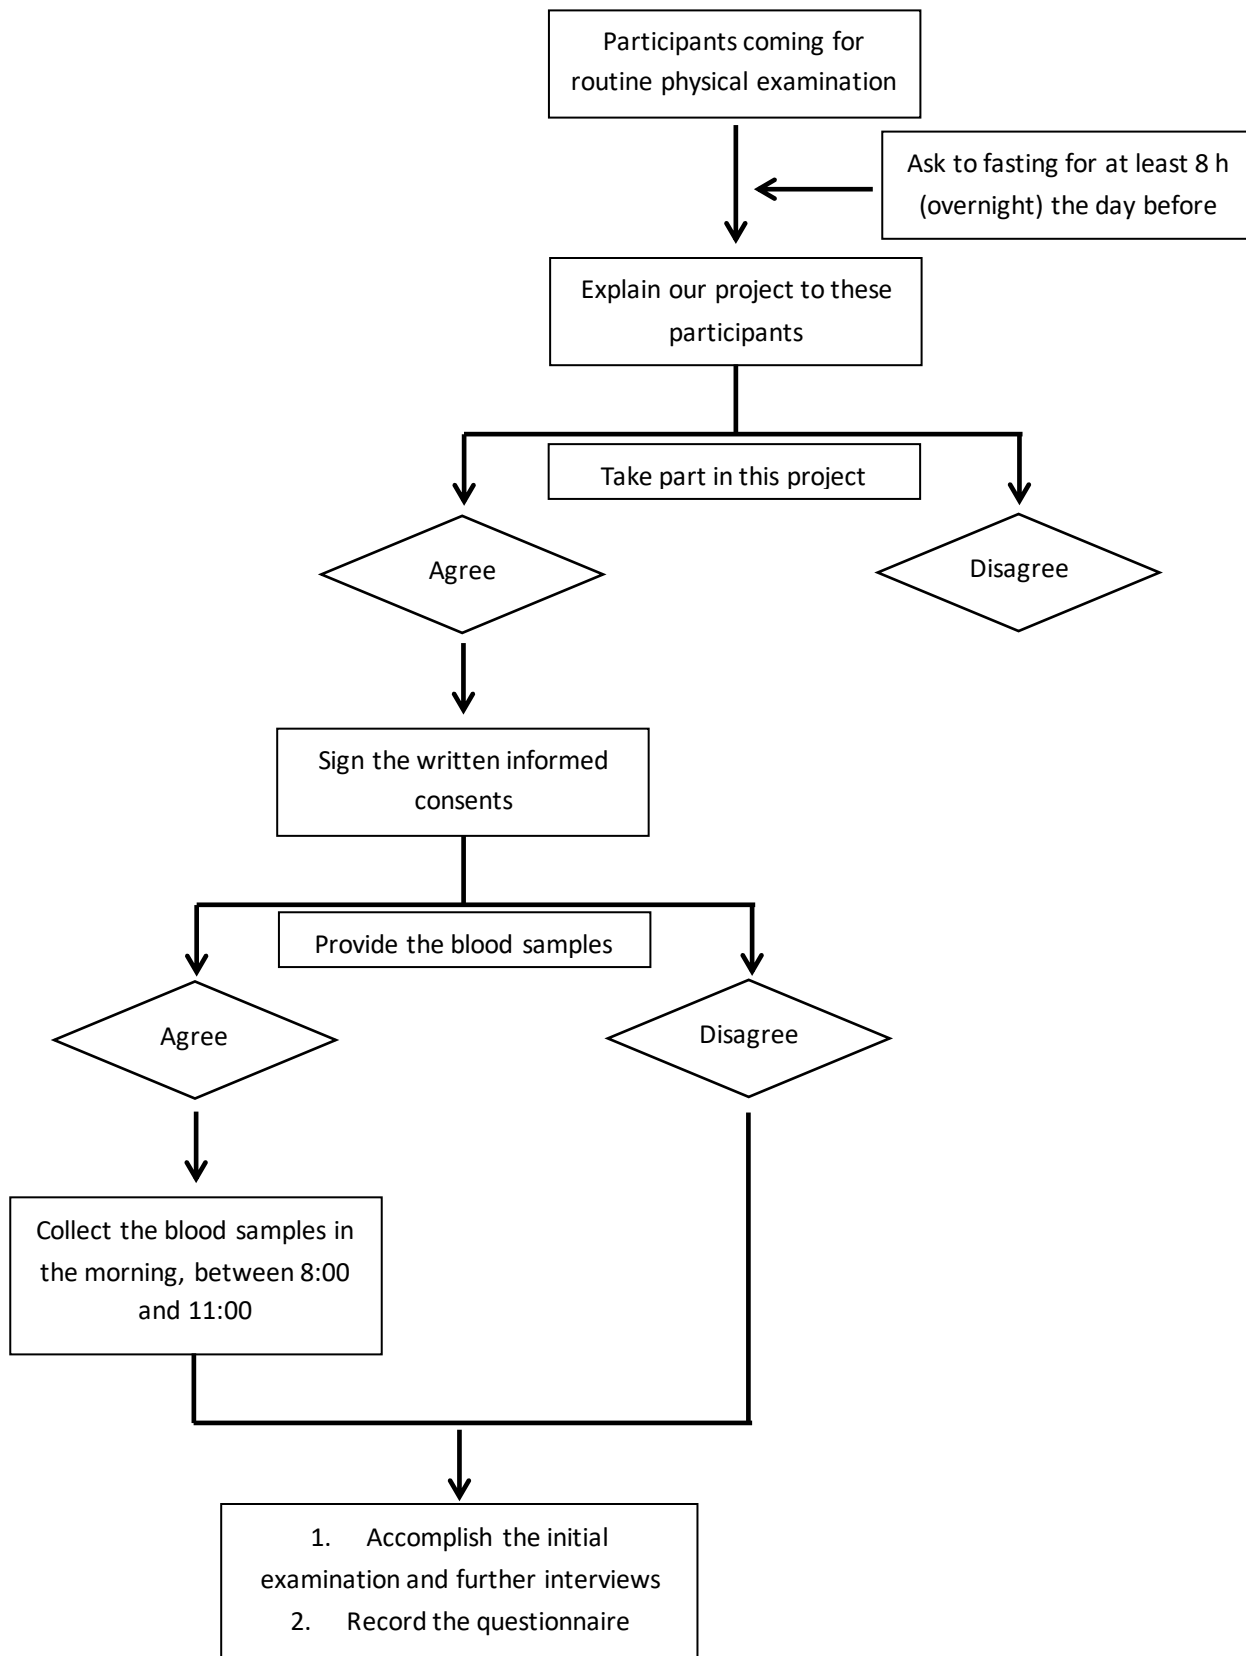

Figure S1. The flow of participants' collection

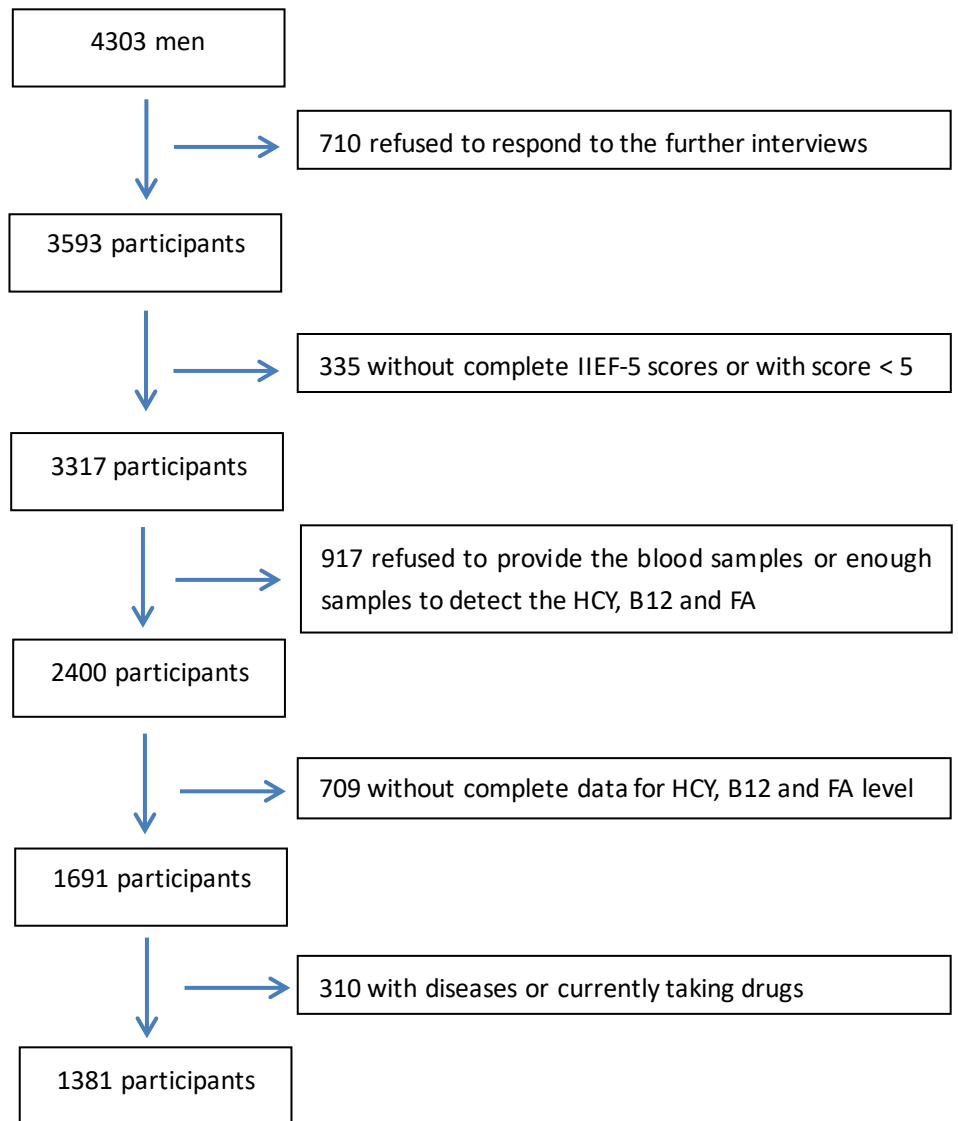

Figure S2. The flow for screening the eligible participants
